# Supplementary material
Source: PubMed Central journal article supplement (PMC522044)

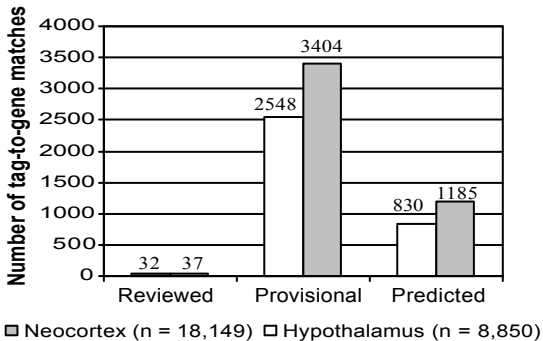

Supplement: pnas_101_41_14972__3.pdf [file pnas_101_41_14972__3.pdf]

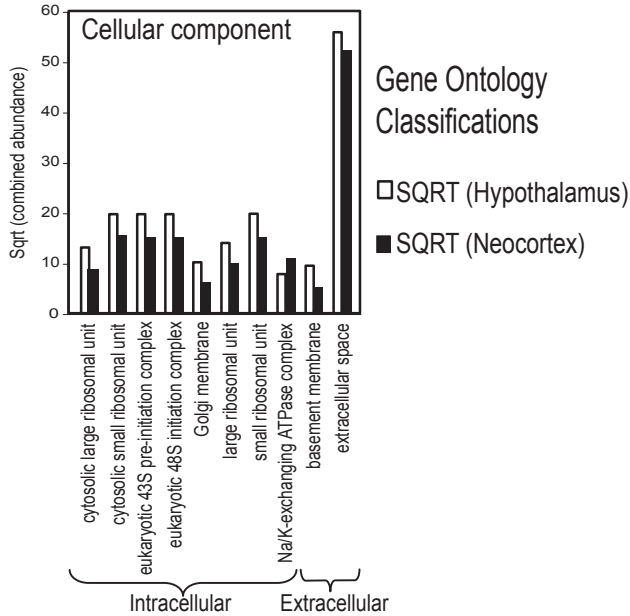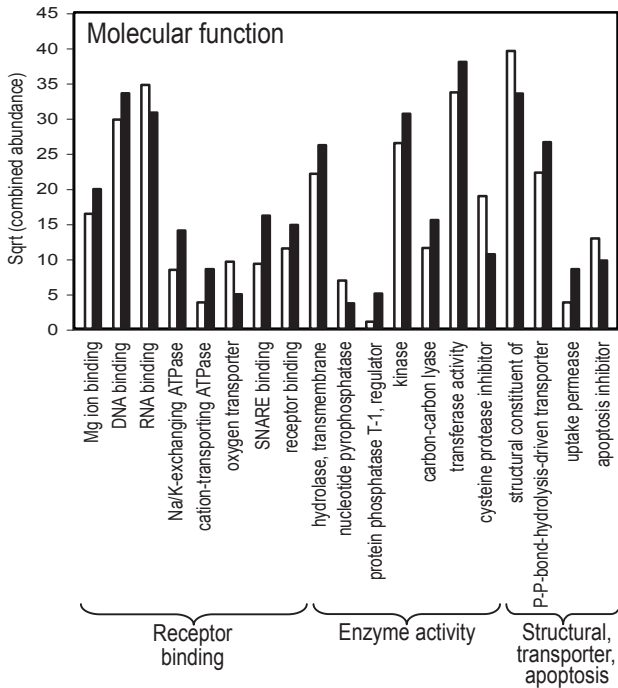

Supplement: pnas_101_41_14972__5.pdf [file pnas_101_41_14972__5.pdf]
